# Supplementary material for: One-step electrospinning PMMA-SPO with hierarchical architectures as a multi-functional transparent screen window
Source: Royal Society of Chemistry journal article supplement (doi:10.1039/d2nj02851d), 2022-01-01
Supplement: d2nj02851d1.pdf [file d2nj02851d1.pdf]

## Support information

### One-step electrospinning PMMA-SPO with hierarchical architectures as multi-functional transparent screen window

Rongxing Tang<sup>a</sup>, Yanan Xiao<sup>a</sup>, Hao Luo<sup>a</sup>, Xiaolan Qiao<sup>b\*</sup>, Jiazi Hou<sup>a\*</sup>

<sup>a</sup> Key Laboratory of Automobile Materials of Ministry of Education, College of Materials Science and Engineering, Jilin University, Changchun, 130025, China.

<sup>b</sup> State Key Laboratory for Modification of Chemical Fibers and Polymer Materials, College of Materials Science and Engineering, Donghua University, Shanghai 201620, People's Republic of China.

**KEYWORDS:** PMMA; SPO; electrospinning; screen window; transparent.

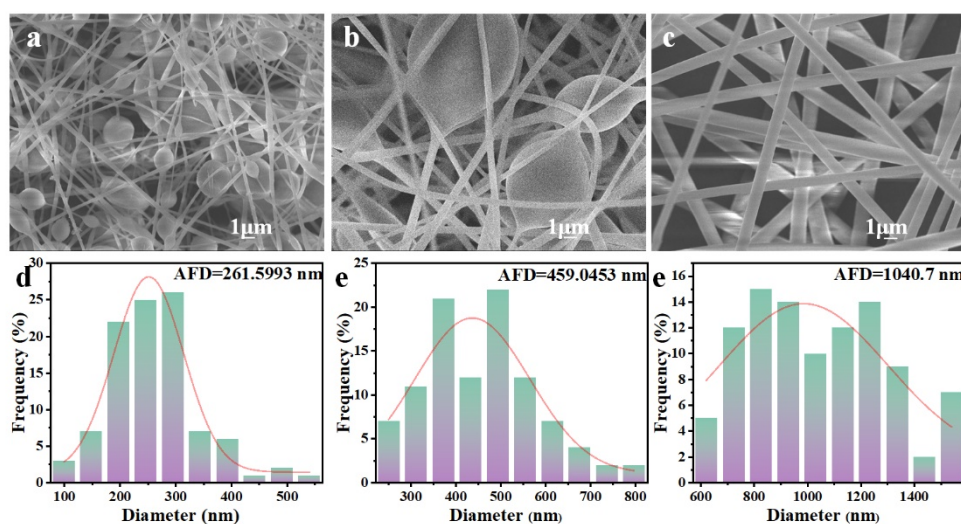

**Fig.S1** SEM images and diameter distributions of PMMA-SPO nanofibers sprayed on screen window in 10 min process time with concentration of 28% (a), (d), 32% (b), (e) and 38% (c), (f), respectively.

**Table S1** Color coordinates of PMMA-SPO membranes with different contents of PMMA and after 0s, 10s, 30s, 60s, 100s UV irradiation.

| concentration |    | 0s    | 10s   | 30s   | 60s   | 100s  |
|---------------|----|-------|-------|-------|-------|-------|
| 28% PMMA      | L* | 87.83 | 92.01 | 83.92 | 84.21 | 78.14 |
|               | a* | 8.72  | 8.98  | 8.21  | 8.72  | 7.72  |
|               | b* | 19.09 | 19.27 | 17.84 | 17.69 | 14.97 |
| 32% PMMA      | L* | 38.22 | 35.12 | 40.13 | 30.75 | 42.91 |
|               | a* | 3.70  | 4.91  | 4.50  | 5.20  | 5.36  |
|               | b* | -3.13 | -4.67 | -2.26 | -4.78 | -5.62 |
| 38% PMMA      | L* | 37.16 | 31.22 | 33.94 | 29.71 | 51.06 |
|               | a* | 0.50  | 4.55  | 5.73  | 5.59  | 3.28  |
|               | b* | -1.72 | -8.68 | -9.92 | -9.92 | -8.16 |

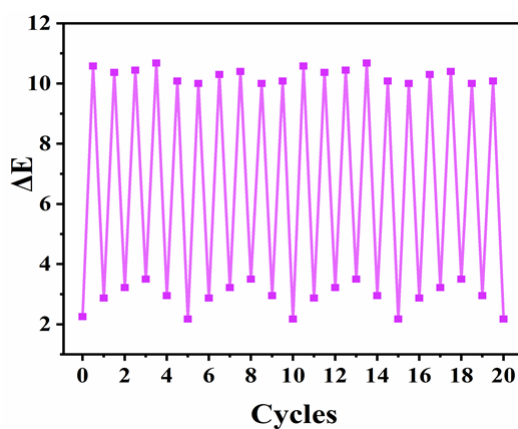

**Fig.S2** The reversibility property (samples were irradiated with 365 nm UV light for 100 s followed by removing light for 5 min).

**Table S2** Solution properties of the electrospinning precursors of different PMMA concentration.

| Sample   | Conductivity<br>( $\mu\text{s}\cdot\text{cm}^{-1}$ ) | Viscosity<br>( $\text{mpa}\cdot\text{s}^{-1}$ ) | Surface Tension<br>( $\text{mN}\cdot\text{m}^{-1}$ ) |
|----------|------------------------------------------------------|-------------------------------------------------|------------------------------------------------------|
| 28% PMMA | 275.7                                                | 1243.3                                          | 84.43                                                |
| 32% PMMA | 314.5                                                | 1646.8                                          | 84.58                                                |
| 32% PMMA | 377.1                                                | 2014.4                                          | 85.37                                                |

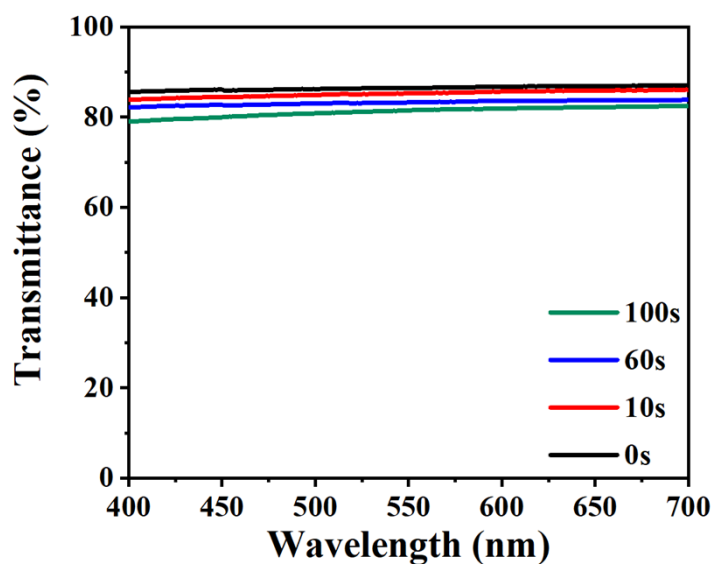

**Fig.S3** The light transmittance of the screen window after ultraviolet radiation with 0s, 10s, 60s and 100s, respectively.

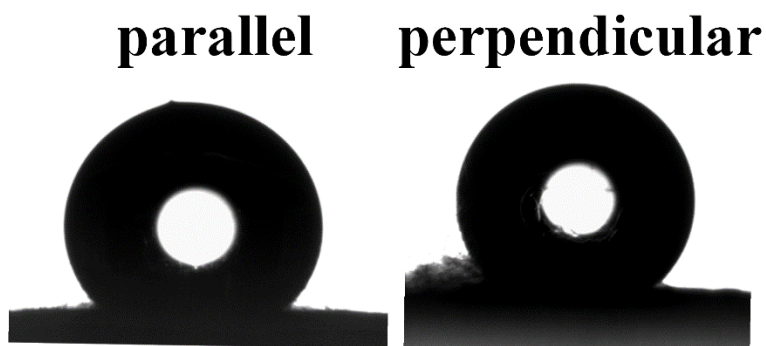

**Fig.S4** The advancing water contact angles of the parallel and perpendicular to the fiber

arrangement.
